# Supplementary material for: Molecular Mechanisms of Oxidative Stress Relief by CAPE in ARPE−19 Cells
Source: MDPI journal article supplement (doi:10.3390/ijms24043565), 2023-02-10
Supplement: s1 [file s1]

**Table S1.** Main materials and reagents.

| Reagents                                                                          | Source                               |
|-----------------------------------------------------------------------------------|--------------------------------------|
| Fetal Bovine Serum (FBS)                                                          | Gibco (Gibco, Grand Island, NY, USA) |
| Trypsin-EDTA (0.25%)                                                              | Gibco (Gibco, Grand Island, NY, USA) |
| DMEM/F-12 Basic                                                                   | Gibco (Gibco, Grand Island, NY, USA) |
| DMEM/F-12 (HEPES, Phenol Red)                                                     | Gibco (Gibco, Grand Island, NY, USA) |
| DPBS(Ca <sup>2+</sup> or Mg <sup>2+</sup> free)                                   | Gibco (Gibco, Grand Island, NY, USA) |
| 20×TBST                                                                           | Solarbio (Beijing, China)            |
| Restore™ PLUS Western Blot Stripping Buffer                                       | Thermo Scientific (Waltham, MA, USA) |
| HRP-labeled Goat Anti-Mouse IgG(H+L)                                              | CST (Danvers, MA, USA)               |
| HRP-labeled Goat Anti-Rabbit IgG(H+L)                                             | CST (Danvers, MA, USA)               |
| ECL Kit                                                                           | Cyvita (Shanghai, China)             |
| 384 Well Plate                                                                    | Roche (Basel, Switzerland)           |
| 4% Paraformaldehyde (PFA)                                                         | Solarbio (Beijing, China)            |
| BSA (Fatty Acid and IgG Free, BioPremium)                                         | Beyotime (Shanghai, China)           |
| Goat Serum                                                                        | Beyotime (Shanghai, China)           |
| Hanks' Balanced Salt Solution (HBSS)(with Ca <sup>2+</sup> and Mg <sup>2+</sup> ) | Beyotime (Shanghai, China)           |

**Table S2.** Primers for Quantitative Real-Time PCR.

| Primer                       | Sequence                |
|------------------------------|-------------------------|
| <b>Human Polr2f Forward.</b> | ACAGATCCTCTGCTCATTGC    |
| Human Polr2f Reverse         | GTGCCGCTGAGTAAATGGGA    |
| Human ARC Forward            | CTCAGCTGCAGGAAGGACAT    |
| Human ARC Reverse            | CAGTGGACAAGGCAGAACGA    |
| Human EGR-1 Forward          | GGTCAGTGGCCTAGTGAGC     |
| Human EGR-1 Reverse          | GTGCCGCTGAGTAAATGGGA    |
| Human FOS Forward            | CACTCCAAGCGGAGACAGAC    |
| Human FOS Reverse            | AGGTCATCAGGGATCTTGACG   |
| Human JUNB Forward           | ACGACTCATACACAGCTACGG   |
| Human JUNB Reverse           | GCTCGGTTTCAGGAGTTTGTAGT |
| Human JUND Forward           | TCATCATCGAGTCCAACGG     |
| Human JUND Reverse           | TTCTGCTTGTGTAAATCCTCCAG |
| Human MYC Forward            | GTCAAGAGGCGAACACACAAC   |
| Human MYC Reverse            | TTGGACGGACAGGATGTATGC   |
| Human ZNF268 Forward         | AGGGTCCGGACAGCTTCTAT    |
| Human ZNF268 Reverse         | GAGGTTGCAGACCAGGAGTC    |
| Human UCP2 Forward           | GTCCGGTTACAGATCCAAGGAG  |
| Human UCP2 Reverse           | CTTTACCACATCCGTGGGCT    |

**Table S3.** The sequences of the UCP2 siRNA (Human).

| Product number | Sense                 | Antisense              |
|----------------|-----------------------|------------------------|
| sc-A           | GAAGAACGGGACACCUUUATT | UAAAGGUGUCCCGUUCUUCTT  |
| sc-B           | CUCGUCUUGUUGCUGAUUATT | UAAUCAGCAACAAGACGAGTT  |
| sc-C           | GCAUCAUGGUUGGGUUCAATT | UUGAACCCCAACCAUGAUGCTT |

A

Level2

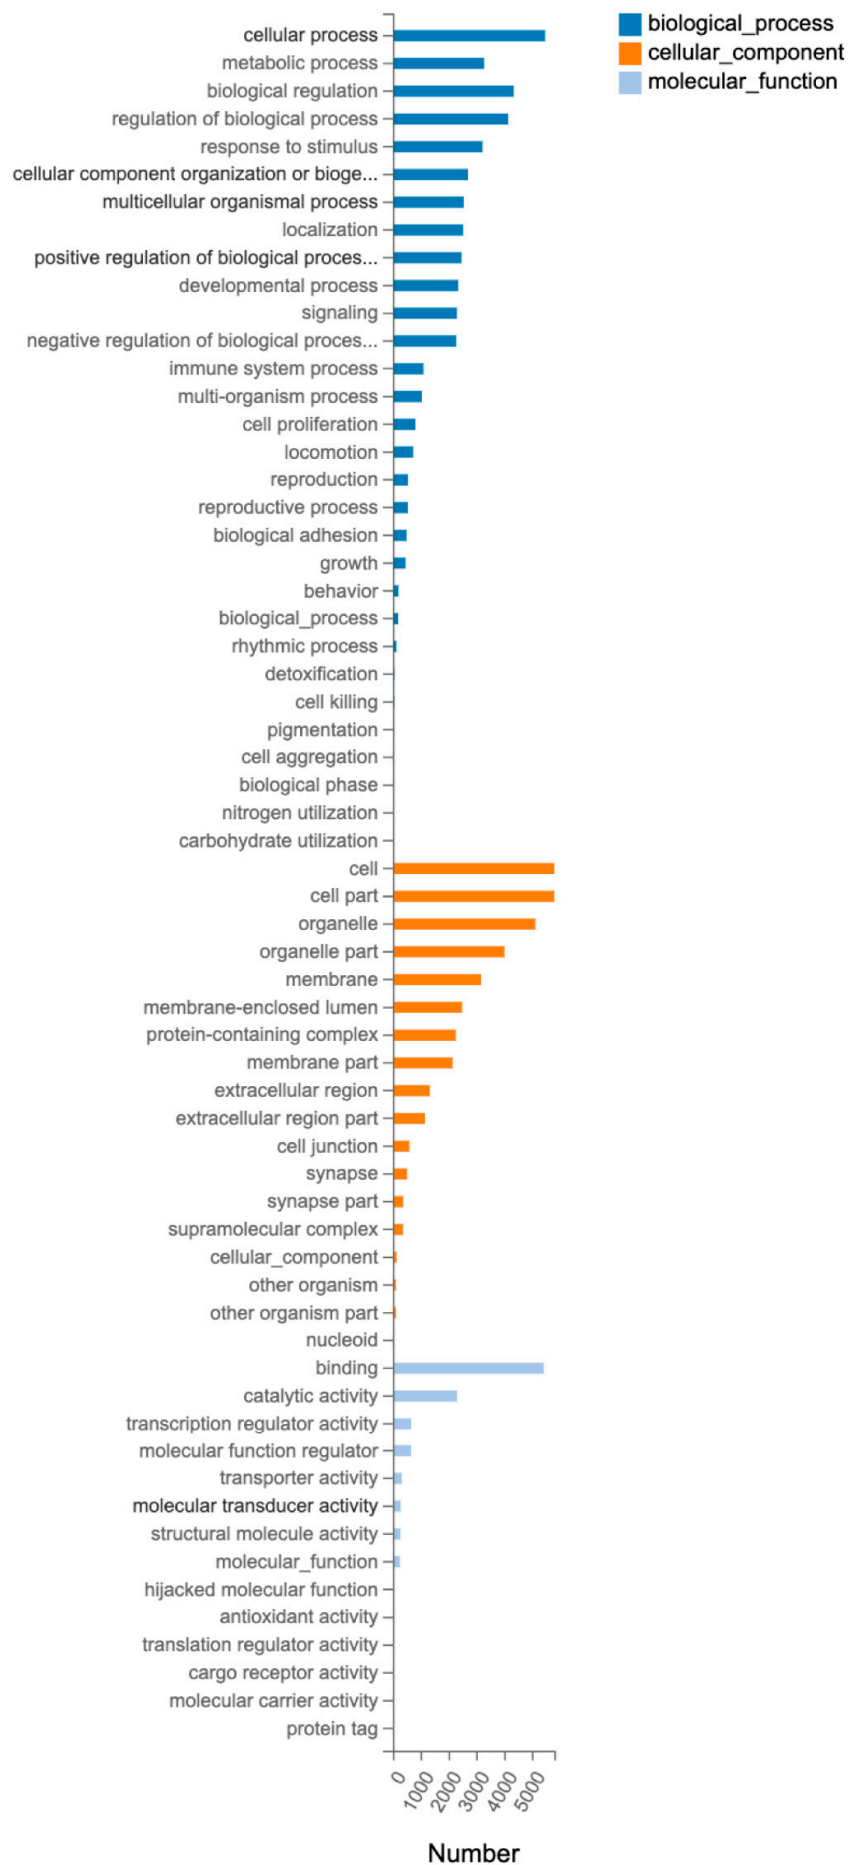

t-BHP vs Control

**Figure S1.** GO enrichment of DEGs. Biological process, cellular component, and molecular function classification were conducted based on DEGs test results of the t-BHP vs. control group (A), or DEGs of the CAPE + t-BHP vs. control group (A). GO annotation of DEGs is classified and mapped. X-axis: the number of genes annotated to the GO entry; Y-axis: the GO functional classification.

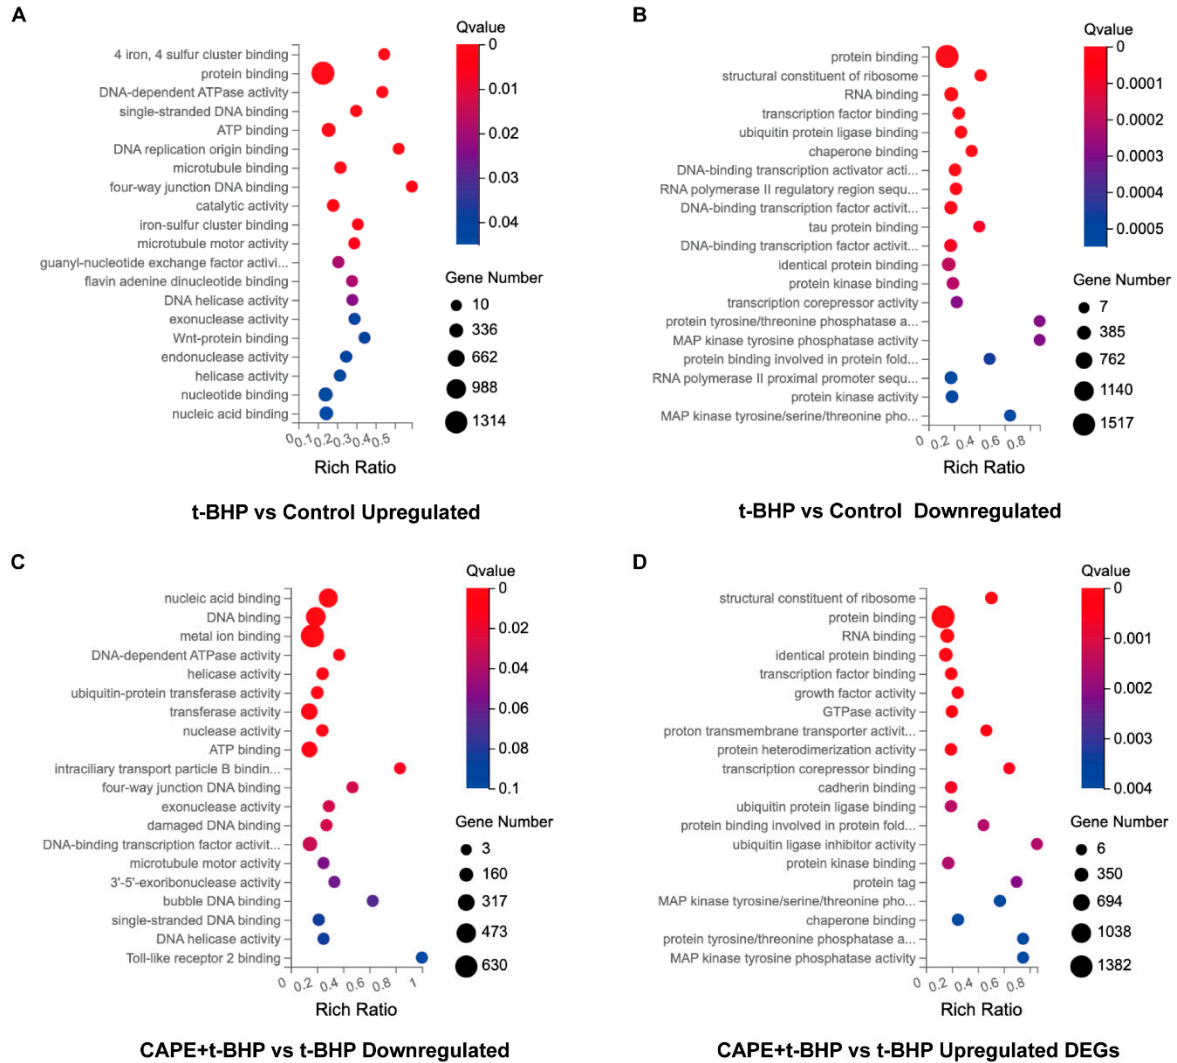

**Figure S2.** The top 20 of GO enrichment of DEGs in molecular function. Upregulated (A) or downregulated (B) DEGs of t-BHP vs. control enrichment; Downregulated (C) or upregulated (D) DEGs of CAPE + t-BHP vs. t-BHP enrichment. Q-value  $\leq 0.05$  are considered significant enrichment.

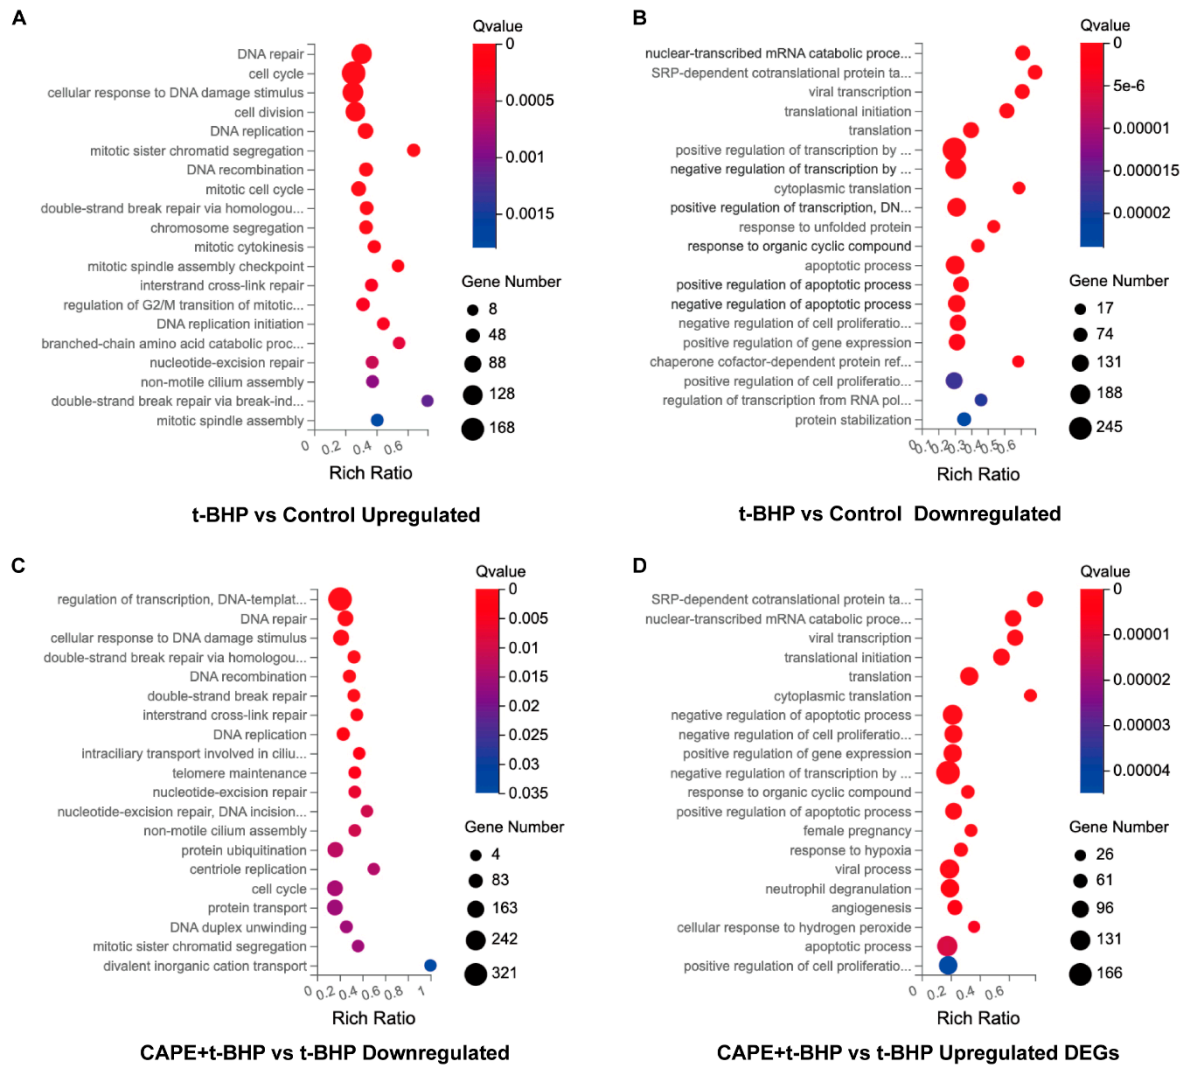

**Figure S3.** The top 20 of GO enrichment of DEGs in biological process.

Upregulated (A) or downregulated (B) DEGs of t-BHP vs. control enrichment;  
 Downregulated (C) or upregulated (D) DEGs of CAPE + t-BHP vs. t-BHP enrichment.  
 Q-value  $\leq 0.05$  are considered significant enrichment.
